# Supplementary material for: Characterization of a novel bacteriophage endolysin (LysAB1245) with extended lytic activity against distinct capsular types associated with Acinetobacter baumannii resistance
Source: PubMed Central journal article supplement (PMC10760713; doi:10.1371/journal.pone.0296453), 2024-01-02
Supplement: pone.0296453.s001.pdf [file pone.0296453.s001.pdf]

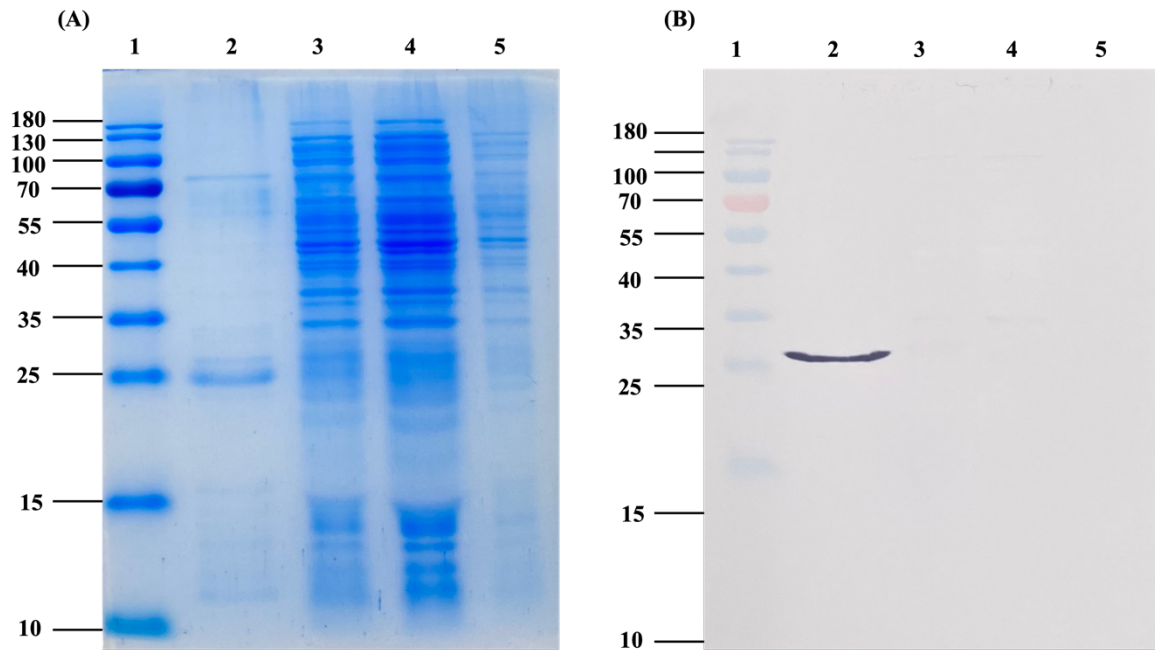

**S1 Fig. Raw image.** SDS-PAGE and western blot images for Fig 2. Lane 1, molecular size marker; lane 2, purified LysAB1245; lane 3, expression sample; lane 4, washed sample; lane 5, unbound sample.
