# Supplementary material for: Characterization of a novel bacteriophage endolysin (LysAB1245) with extended lytic activity against distinct capsular types associated with Acinetobacter baumannii resistance
Source: PubMed Central journal article supplement (PMC10760713; doi:10.1371/journal.pone.0296453), 2024-01-02
Supplement: pone.0296453.s002.pdf [file pone.0296453.s002.pdf]

| <b>Colysis activity on ABMYS-1</b>    |               |               |               |            |            |            |           |
|---------------------------------------|---------------|---------------|---------------|------------|------------|------------|-----------|
| <b>LysAB1245</b>                      | <b>CFU/ml</b> | <b>CFU/ml</b> | <b>CFU/ml</b> | <b>log</b> | <b>log</b> | <b>log</b> | <b>SD</b> |
|                                       | <b>1</b>      | <b>2</b>      | <b>3</b>      | <b>1</b>   | <b>2</b>   | <b>3</b>   |           |
| 0m                                    | 1.70E+05      | 1.50E+05      | 1.40E+05      | 5.23       | 5.18       | 5.15       | 0.04      |
| 2h                                    | 1.00E+02      | 1.00E+02      | 1.00E+02      | 2.00       | 2.00       | 2.00       | 0.00      |
| 24h                                   | 1.00E+02      | 1.00E+02      | 1.00E+02      | 2.00       | 2.00       | 2.00       | 0.00      |
| <b>PBS</b>                            |               |               |               |            |            |            |           |
| 0m                                    | 1.50E+05      | 1.90E+05      | 1.50E+05      | 5.18       | 5.28       | 5.18       | 0.05      |
| 2h                                    | 2.10E+05      | 2.40E+05      | 2.80E+05      | 5.32       | 5.38       | 5.45       | 0.06      |
| 24h                                   | 1.20E+06      | 1.30E+06      | 1.80E+06      | 6.08       | 6.11       | 6.26       | 0.08      |
| <b>pH stability</b>                   |               |               |               |            |            |            |           |
|                                       | <b>1</b>      | <b>2</b>      | <b>3</b>      | <b>1</b>   | <b>2</b>   | <b>3</b>   | <b>SD</b> |
| Control(PBS7.4)                       | 100.00        | 100.00        | 100.00        |            |            |            |           |
| Lys4.5                                | 0.01          | 0.00          | 0.01          | 99.99      | 100.00     | 99.99      | 0.00      |
| Lys5.5                                | 0.01          | 0.00          | 0.01          | 99.99      | 100.00     | 99.99      | 0.00      |
| Lys7.4                                | 0.01          | 0.00          | 0.01          | 99.99      | 100.00     | 99.99      | 0.00      |
| Lys8.5                                | 0.01          | 0.00          | 0.01          | 99.99      | 100.00     | 99.99      | 0.00      |
| Lys10.5                               | 0.01          | 0.00          | 0.01          | 99.99      | 100.00     | 99.99      | 0.00      |
| <b>Thermal stability</b>              |               |               |               |            |            |            |           |
|                                       | <b>1</b>      | <b>2</b>      | <b>3</b>      | <b>1</b>   | <b>2</b>   | <b>3</b>   | <b>SD</b> |
| Control(PBS)                          | 100.00        | 100           | 100           |            |            |            |           |
| 4                                     | 0.88          | 0.83          | 0.89          | 99.13      | 99.17      | 99.11      | 0.03      |
| 25                                    | 1.13          | 1.00          | 1.00          | 98.88      | 99.00      | 99.00      | 0.06      |
| 37                                    | 1.06          | 1.11          | 1.00          | 98.94      | 98.89      | 99.00      | 0.05      |
| 50                                    | 1.63          | 1.50          | 1.58          | 98.38      | 98.50      | 98.42      | 0.05      |
| 60                                    | 1.75          | 1.61          | 1.58          | 98.25      | 98.39      | 98.42      | 0.08      |
| 70                                    | 1.69          | 1.72          | 1.74          | 98.31      | 98.28      | 98.26      | 0.02      |
| <b>Time-kill</b>                      |               |               |               |            |            |            |           |
| <b>Control (PBS) at interval time</b> | <b>CFU/ml</b> | <b>CFU/ml</b> | <b>CFU/ml</b> | <b>log</b> | <b>log</b> | <b>log</b> | <b>SD</b> |
|                                       | <b>1</b>      | <b>2</b>      | <b>3</b>      | <b>1</b>   | <b>2</b>   | <b>3</b>   |           |
| 0                                     | 5.00E+04      | 5.00E+04      | 6.00E+04      | 4.70       | 4.70       | 4.78       | 0.05      |
| 0.25                                  | 4.00E+04      | 5.00E+04      | 1.00E+05      | 4.60       | 4.70       | 5.00       | 0.21      |
| 0.5                                   | 3.00E+04      | 4.00E+04      | 4.00E+04      | 4.48       | 4.60       | 4.60       | 0.07      |
| 1                                     | 4.00E+04      | 4.00E+04      | 6.00E+04      | 4.60       | 4.60       | 4.78       | 0.10      |
| 1.5                                   | 8.00E+04      | 9.00E+04      | 1.20E+05      | 4.90       | 4.95       | 5.08       | 0.09      |
| 2                                     | 8.00E+04      | 8.00E+04      | 1.50E+05      | 4.90       | 4.90       | 5.18       | 0.16      |
| 2.5                                   | 1.60E+05      | 1.80E+05      | 1.80E+05      | 5.20       | 5.26       | 5.26       | 0.03      |
| <b>LysAB1245 at interval time</b>     | <b>CFU/ml</b> | <b>CFU/ml</b> | <b>CFU/ml</b> | <b>log</b> | <b>log</b> | <b>log</b> | <b>SD</b> |
|                                       | <b>1</b>      | <b>2</b>      | <b>3</b>      | <b>1</b>   | <b>2</b>   | <b>3</b>   |           |
| 0                                     | 5.00E+04      | 6.00E+04      | 5.00E+04      | 4.70       | 4.78       | 4.70       | 0.05      |
| 0.25                                  | 6.00E+03      | 8.00E+03      | 1.10E+04      | 3.78       | 3.90       | 4.04       | 0.13      |
| 0.5                                   | 1.00E+02      | 1.00E+02      | 1.00E+02      | 2.00       | 2.00       | 2.00       | 0.00      |
| 1                                     | 1.00E+02      | 1.00E+02      | 1.00E+02      | 2.00       | 2.00       | 2.00       | 0.00      |
| 1.5                                   | 1.00E+02      | 1.00E+02      | 1.00E+02      | 2.00       | 2.00       | 2.00       | 0.00      |
| 2                                     | 1.00E+02      | 1.00E+02      | 1.00E+02      | 2.00       | 2.00       | 2.00       | 0.00      |
| 2.5                                   | 1.00E+02      | 1.00E+02      | 1.00E+02      | 2.00       | 2.00       | 2.00       | 0.00      |
